# Supplementary material for: The impact of structural polydispersivity on the surface electrostatic potential of nanodiamond
Source: Royal Society of Chemistry journal article supplement (doi:10.1039/c3nr05344j), 2013-12-03
Supplement: c3nr05344j.pdf [file c3nr05344j.pdf]

# The Impact of Structural Polydispersivity on the Surface Electrostatic Potential of Nanodiamond

A. S. Barnard\* and E. Ōsawa†

\* Virtual Nanoscience Laboratory,  
CSIRO Materials Science and Engineering,  
Parkville, VIC, 3052, Australia,

† NanoCarbon Research Institute, AREC,  
Faculty of Textile Science and Technology, Shinshu University,  
Ueda, Nagano, Japan

November 27, 2013

## **Supplementary Information**

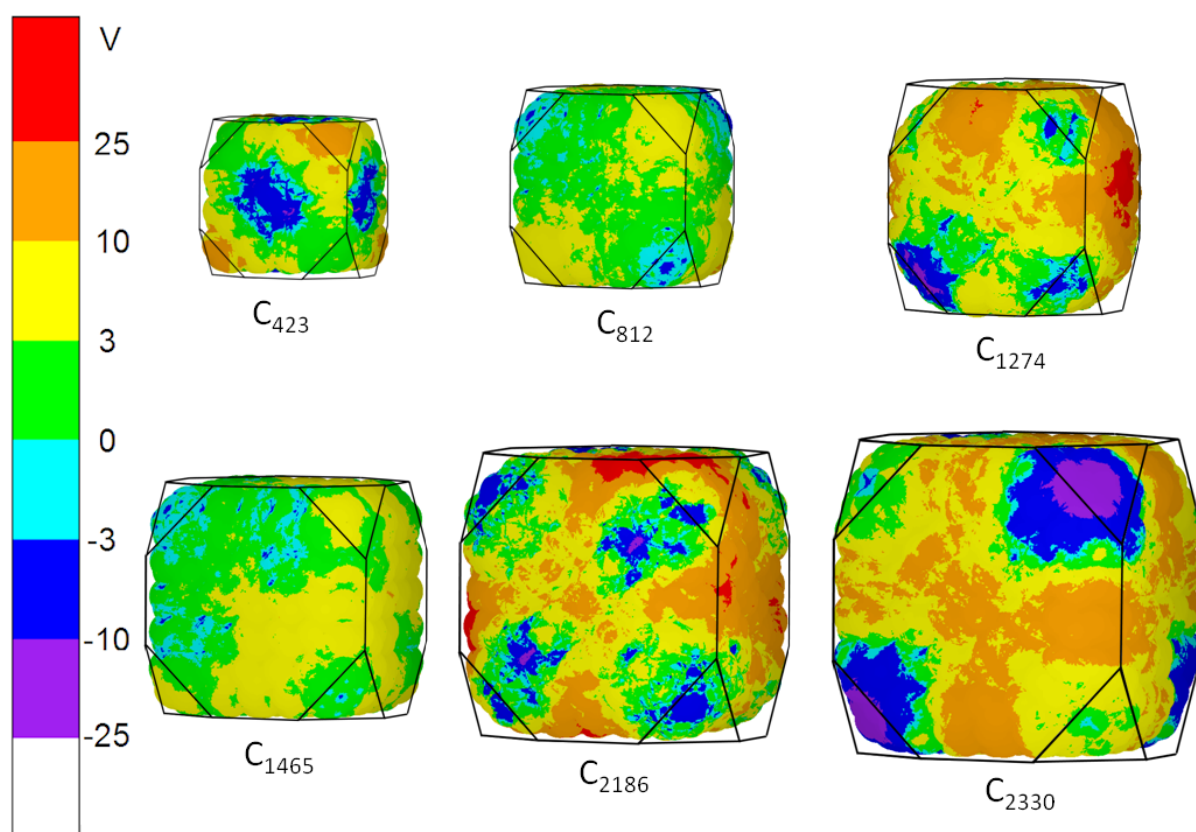

Figure 1: Surface electrostatic potential (SEP) for a series of reconstructed nanodiamonds with the truncated cube (o-HH) shape, calculated with a dielectric constant of 10. Number of atoms in each structure is provided in the subscripts.

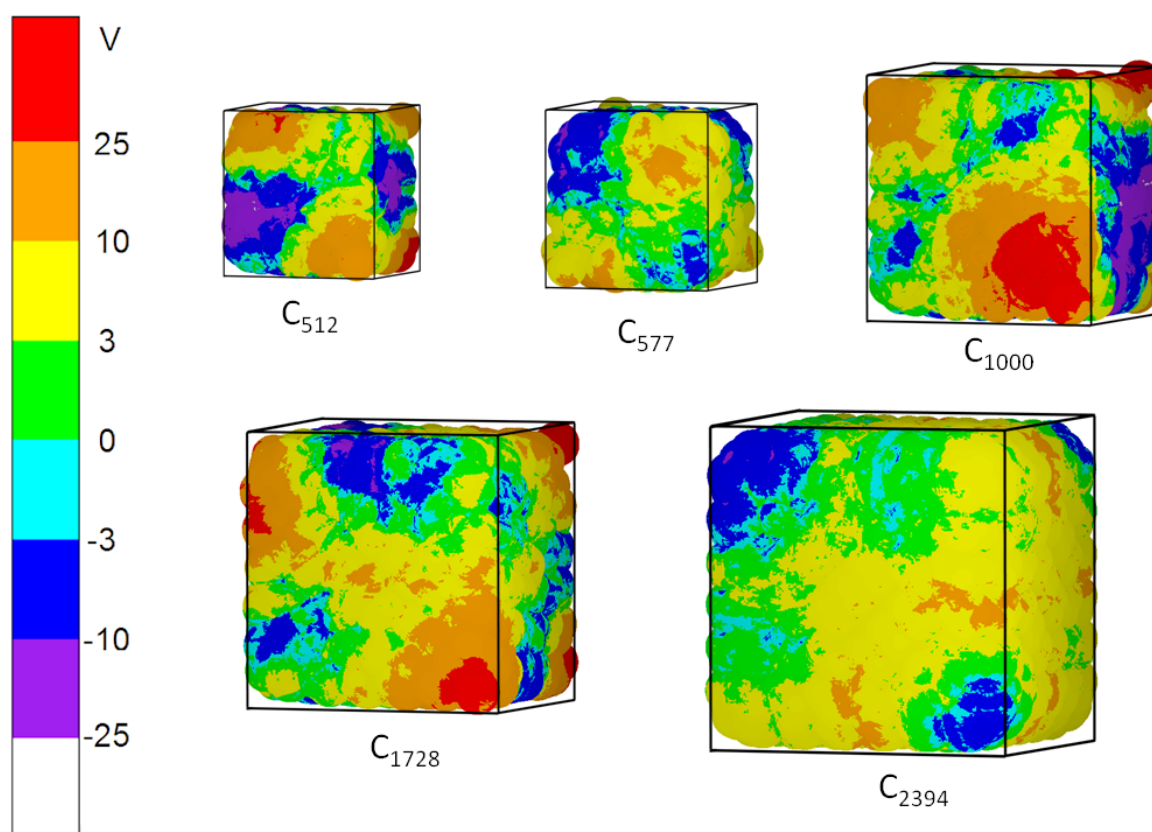

Figure 2: Surface electrostatic potential (SEP) for a series of reconstructed nanodiamonds with the regular hexahedron, or cubic (HH) shape, calculated with a dielectric constant of 10. Number of atoms in each structure is provided in the subscripts.
